# Supplementary material for: Genetic polymorphisms in Japanese fragrant landraces and novel fragrant allele domesticated in northern Japan
Source: PubMed Central journal article supplement — Breed Sci. 2014 Jun 1;64(2):115–24. doi: 10.1270/jsbbs.64.115 (PMC4065318; doi:10.1270/jsbbs.64.115), 2014-06-01
Supplement: 64_115_1.pdf [file 64_115_1.pdf]

**Supplemental Table 1.** List of SSR markers used to evaluate genetic divergence and diversity

| Locus    | Chromosome | Genome position | Motif   | Forward primer           | Reverse primer            | <i>N<sub>a</sub></i> | <i>H<sub>e</sub></i> |
|----------|------------|-----------------|---------|--------------------------|---------------------------|----------------------|----------------------|
| RM6405   | 1          | 31266464        | (GGA)7  | GGAGGAGCTATAGGATCGGG     | CGCTCGAATCTGCGGTAC        | 3                    | 0.273                |
| RM6840   | 1          | 43499589        | (CCT)22 | TACCAAGACTCCGCTATGGC     | GAAGAAGGATCATGGATCG       | 11                   | 0.811                |
| RM6853   | 2          | 8985893         | (TGC)8  | CAACACGCACATCCTGTACC     | CTCCAAAGACGAGACCAAGG      | 3                    | 0.219                |
| RM3688   | 2          | 23227884        | (GA)15  | GTTGAATCAAGCTGTGCAGC     | AGCTAGGCAAAGCATGCATG      | 5                    | 0.661                |
| RM3730   | 2          | 27098371        | (GA)13  | TGCGAGTATCTTCAAGGCAG     | ATTGAGGGGGCTAATCATCC      | 6                    | 0.659                |
| RM6301   | 3          | 2631471         | (CTT)8  | CGCTACCTTATGCTGCTGTC     | TCGGCTACAACCTCTCCTTC      | 2                    | 0.198                |
| RM3180   | 3          | 18220879        | (CT)12  | GGGTCGGATAGCCACACAC      | GAGGTAATCTCGCGGAGTTG      | 7                    | 0.660                |
| RM8208   | 3          | 22357040        | (AG)8   | GCCCAAACACTACTCTTTG      | GTAAATGCCTGAGTGCCTAC      | 13                   | 0.769                |
| SSR5     | 4          | 27568679        | (AT)5   | CTTGTCAACTACTGTGGCAAG    | AGAAGATCAACGGTGGTATAG     | 2                    | 0.094                |
| AP005527 | 6          | 8324649         | (TC)10  | CAGTCCAAGAATCGTACTTC     | GCTTTTGCTGTGATTTGGTG      | 12                   | 0.860                |
| RM3827   | 6          | 22297202        | (GA)21  | CACCAGCTTCACTTCATCTC     | CCTTTCTCAATCTGCATTC       | 10                   | 0.506                |
| SSR2     | 6          | 25602910        | (CCG)5  | CTCCACCGTGAATGTACGTAAG   | GCGATCACCTCTGCAAC         | 3                    | 0.588                |
| +29Cat   | 6          | 30917713        | (CT)10  | CACGATCTAGAAGACGAGAG     | CCAAATTACGCCTTCTTACC      | 5                    | 0.381                |
| AP005454 | 7          | 3140437         | (ATT)24 | CAGATATAGGCTCCAGATAC     | AGTACGAGGAAGCTGTTGGC      | 12                   | 0.860                |
| RM214    | 7          | 13444643        | (TC)32  | CTGATGATAGAAAACCTCTTCTC  | AAGAACAGCTGACTTCACAA      | 14                   | 0.830                |
| RM3691   | 7          | 19886294        | (GA)15  | GCTGATGGTCAAAGATCAGG     | ATGTGTCTGCTGGCACAGAG      | 9                    | 0.698                |
| wags74   | 7          | 29197874        | (CGC)6  | GCCTGCCTACCCATACTTA      | ATCGGTACGGCGTCAGTAAG      | 2                    | 0.178                |
| RM1309   | 8          | 19178297        | (AG)19  | AGGAGACTGCAGATCACAAC     | CCCTCAGTTACCCTTAATCC      | 8                    | 0.472                |
| RM8264   | 8          | 19833194        | (GA)15  | ACGCTCTCGCTTTCTAC        | GCACCTCACACCAGTAATTC      | 7                    | 0.736                |
| SSRat7   | 8          | 20379336        | (AT)7   | TGATGTGCCCTCTCCTTTC      | CATAAATAATGGCATCTTCTATATA | 4                    | 0.510                |
| RM1109   | 8          | 20483289        | (AG)12  | TCAAAATCACGTGTATGTAAGC   | TTTACAAAGGACAGAGGGC       | 4                    | 0.668                |
| RM3459   | 8          | 20519942        | (CT)20  | ATGGACTTTCGAGAATGTTG     | GAGTACGAAATGAAGGCAAG      | 8                    | 0.775                |
| AP003898 | 8          | 20665998        | (AT)9   | CTCCACCTCTCACTTTCTC      | GCTTTCACCTTGCTCCTC        | 3                    | 0.329                |
| AP004617 | 8          | 20773444        | (AT)5   | GAAATGGCAAGTCTTGTG       | GGAGATTGCCGGAAGTTATG      | 2                    | 0.071                |
| RM6850   | 8          | 22150412        | (TGA)13 | CTAGCTCCAAGAGAGAATGC     | GCCCTTGATTTACTAATCTCG     | 6                    | 0.510                |
| RM311    | 10         | 9487243         | (TG)5   | TGGTAGTATAGGTACTAAACAT   | TCCTATACACATACAAACATAC    | 6                    | 0.307                |
| RM441    | 11         | 6067219         | (GA)17  | ACACCAGAGAGAGAGAGAGAG    | TCTGCAACCGCTGATAGATG      | 5                    | 0.555                |
| RM5379   | 11         | 21796175        | (TC)13  | AGGGCAGTCTTACATCCAAC     | CATTTGCTTTATGCCCCAG       | 6                    | 0.437                |
| RM4112   | 11         | 24646853        | (TA)14  | TGGCAAAGTCAGTAGTCTCCACAA | GCCATTCCCCCAACAGCTCC      | 19                   | 0.876                |
| RM17     | 12         | 269554668       | (TC)15  | TGCCCTGTTATTTCTTCTCTC    | GGTGATCCTTTCCCAATTCA      | 3                    | 0.296                |

**Supplemental Table 2.** Additional SSR markers around *Badh2* in order to evaluate selective sweep

| Primer            | Genome position (nt) | Motif   | forward                  | reverse                   | Remark             |
|-------------------|----------------------|---------|--------------------------|---------------------------|--------------------|
| 319kup            | 20057887             | (AG)14  | CCTCTCCACTCCACTACCAACC   | GAAGCTTGCAGCGTGGGAACC     | Nearly monomorphic |
| 186kup            | 20191701             | (AAG)9  | GTTTCATTTTCGCTTCTGATTCC  | TTGCCGTTTGTTAATGCAGAGG    | Monomorphic        |
| 160kup            | 20217308             | (ATC)7  | GAGCATGATCTCCACTTTGTTGG  | GCCATCACAAACAGCCTAACG     | Monomorphic        |
| 65kup             | 20312594             | (AG)11  | CATGGTGTTTGGAGGAATGAGC   | CAATAAGAGAGCACGCACATGG    | Monomorphic        |
| 55kup (RM8264)    | 19833194             | (GA)15  | ACGCTCCTCGCTTTCTAC       | GCACCTCACACCAGTAATTC      | Polymorphic        |
| 45kup             | 20333065             | (TA)5   | CTTCTCAGTTCTCCACATTTCTCC | CTTTTCAATAATGTACATAGTC    | Polymorphic        |
| 23kup             | 20353404             | (AAAT)6 | ATTTGAGGAGTGAGAAGCATAC   | TATATCATAAGTAGTTTGATG     | Monomorphic        |
| 18kup             | 20359599             | (CT)6   | AGGGATAGAACAATCTTTTC     | GGTGATGCCGACAAAAGCTTTG    | Monomorphic        |
| 12kup             | 20365223             | (GA)6   | CCTCCTCTGCCGTTTGTCCAG    | CAGTCTAGTTAGTCATTTTC      | Polymorphic        |
| SSRat7            | 20379336             | (AT)7   | TGATGTGCCCTCTCCTTTC      | CATAAATAATGGCATCTTCTATATA | Polymorphic        |
| 10kdown           | 20396905             | (CT)5   | CGACATGGCGTGTGAGTCAG     | AGCTCGTTGTCTTTGATCTC      | Monomorphic        |
| 28kdown           | 20405392             | (CG)5   | GAACGGCGAAGATGAACTCT     | CTGCCGTTTCAAATGGTGGT      | Monomorphic        |
| 44kdown           | 20421435             | (TA)5   | ATATAGTAATATTCCTATCCC    | TTCTGTTTCAAACATTTGCGAC    | Monomorphic        |
| 55kdown           | 20432145             | (AT)6   | GCGAGAGAAGTCAAACTCGAG    | AGTACTTATAGCATAGCTGC      | Nearly monomorphic |
| 80kdown           | 20457312             | (CCG)7  | GCGACGTCACCGACATGAGG     | GCATGATCGGTAGATCACCTTCTCG | Monomorphic        |
| 105kdown (RM1109) | 20483289             | (AG)12  | TCAAAATCACGTGTATGTAAGC   | TTTACAAAGGACAGAGGGC       | Polymorphic        |
| 142kdown (RM3459) | 20519942             | (CT)20  | ATGGACTTTCGAGAATGTTG     | GAGTACGAAATGAAGGCAAG      | Polymorphic        |
| 146kdown          | 20523745             | (AAAC)6 | GTCAACTCCGACACCATCAGAGC  | ACGAACAGCACCAAACACAATCC   | Monomorphic        |
| 179kdown          | 20556187             | (AG)11  | GGGAGCAGTCACCTAACATGTGG  | GTGGCGCGTTAGGTTTCAGG      | Monomorphic        |
| 224kdown          | 20601431             | (AT)23  | ATCTAGGAGCGAAACTTTAGGG   | CCCATTGTACGTAGAAAAGAAGC   | Monomorphic        |

**Supplemental Table 3.** INDEL primers of Up1136, Up1098, 5'-UTR, and I-986 and CAPS-r primer to detect novel allele at exon-intron junction with *Kpn* I restriction enzyme

| INDEL         | Genome position | Forward primer            | Reverse primer            |
|---------------|-----------------|---------------------------|---------------------------|
| Up1136        | 20375802        | CCGACTTAAATACGAACGATGTA   | CTTAATACTATGGCATGTCTTAATA |
| Up1098        | 20375945        | TATTAAGACATGCCATAGTATTAAG | GTTATATCGCAGTCAAACCTCCCG  |
| 5'UTR         | 20377062        | CTCAACGCTCCACTCC          | GTGAGAGATACGGAGATGGATCG   |
| I-986         | 20378011        | GAGGGTGCGCAACAACAAG       | CAACGGAATACCACAAAGGC      |
| INDEL ex7     |                 | GGTTGCATTTACTGGGAGTT      | CAGTCAAACAGGCTGTCAAG      |
| CAPS-r primer |                 |                           | CCCTACCTTGCCCGCGATTG      |

**Supplemental Table 4.** *BADH2* sequence primers

| Forward primer   | Reverse primer | Forward start          | Reverse start             | Genome position |
|------------------|----------------|------------------------|---------------------------|-----------------|
| BADH2 up1400 f   | BADH2 up 521r  | CGTCCCAAGTTAGTATGCA    | ATGTTGGAGGAGAGACGGT       | 20375719        |
| BADH2 up 521f    | BADH2 76r      | ACCGTCTCTCCTCCAACAT    | TGGTGTGAGGTGTGGAGTG       | 20376158        |
| BADH2 up 19f     | BADH2 533r     | CTCAACGCTCCACTCC       | GTCACCACCCTACCTTG         | 20377062        |
| BADH2 RT f       | BADH2-933r     | ATCTCTCACCGACCCCAAATC  | CTCTCCGCTTGAACCCATC       | 20377192        |
| f2               | r2             | CCTCTGTTCTGGACTAGG     | CTACACCGATAGGCTCTTTCCG    | 20377854        |
| BADH2 1602f      | BADH2 2107r    | GGCTAGACTAGAGACGCTTG   | GGAGAGAGTAGCTGCTAGG       | 20378682        |
| BadhapG4 f       | BadhapG4 r     | ATCTTCGAAAGAGCCTATCG   | AGGAGCTACCTTCCATGTTGC     | 20378938        |
| BADH2 1940-500f  | BADH2 r4       | ATATGTTGTCAGCATGATTCAC | CAGAGTCCATAACCAGAC        | 20379484        |
| BADH2 1940-1000f | BADH2-4170r    | CTGGTGTAGACAAGGTACAG   | CAATCATAATCTATTGTTGTACTTG | 20380015        |
| BADH2 3766 f     | BADH2-4506 r   | GAAGGCAGTTAGGAAGGACTG  | CCCATGCAACCATCCTT         | 20380846        |
| BADH2-4220f      | BADH2-5420r    | ACTATTGCACAGAGCGAATA   | AAAGCACAGCACCAG           | 20381300        |
| BADH2 6301-1000f | BADH2 6131r    | TTCTGACTGGTGGGGTTAGA   | CAAGCCGATACGGAGAGAACC     | 20382126        |

**Supplemental Table 5.** Tropical and Temperate Japonica classification performed with hull size ratio, mesocotyl length, and endosperm degradation by KOH treatment among scented fragrant landraces

| Clade        | Landrace/Variety       | Hull size (mm) |       |       | Mesocotyl length (mm) | KOH degradation (%) | Z2-score (Sato 1991) | Classification (Tr-Tm) |
|--------------|------------------------|----------------|-------|-------|-----------------------|---------------------|----------------------|------------------------|
|              |                        | Length         | Width | Ratio |                       |                     |                      |                        |
| Clade 2      | Hokkaido-40-nichi-wase | 7.30           | 3.60  | 2.03  | 50                    | 85.43               | 0.91                 | Tr                     |
|              | Jakou (Niigata)        | 7.80           | 3.50  | 2.23  | 1                     | 25.84               | -0.83                | Tm                     |
|              | Kaori-ine 4            | 7.20           | 3.30  | 2.18  | 3                     | 4.64                | 0.25                 | Tr                     |
|              | Kaori-wase 2           | 7.10           | 3.60  | 1.97  | 9                     | 28.37               | -0.79                | Tm                     |
|              | Kaori-wase 3           | 7.60           | 3.80  | 2.00  | 0                     | 17.02               | -0.42                | Tm                     |
|              | Nioi-wase 2            | 6.60           | 3.50  | 1.89  | 7                     | 52.23               | -1.77                | Tm                     |
| Clade 3      | Iwaka                  | 6.60           | 3.20  | 2.06  | 2                     | 16.20               | -0.48                | Tm                     |
|              | Jakou-ine 2            | 7.30           | 3.50  | 2.09  | 3                     | 52.44               | -1.95                | Tm                     |
|              | Jakou (Ibaraki)        | 7.10           | 3.50  | 2.03  | 1                     | 12.20               | -0.43                | Tm                     |
|              | Jakou-wase             | 7.20           | 3.50  | 2.06  | 2                     | 21.51               | -0.71                | Tm                     |
|              | Kaori-ine 1            | 7.00           | 3.20  | 2.19  | 1                     | 31.11               | -1.10                | Tm                     |
|              | Kaori-ine 2            | 7.00           | 3.30  | 2.12  | 5                     | 10.73               | 0.10                 | Tr                     |
|              | Nioi-akako             | 7.10           | 3.40  | 2.09  | 1.5                   | 29.65               | -1.09                | Tm                     |
|              | Nioi-mai               | 7.50           | 3.50  | 2.14  | 10                    | 84.18               | -2.64                | Tm                     |
| Clade 7      | Hendoyori              | 7.20           | 3.60  | 2.00  | 5                     | 27.55               | -0.76                | Tm                     |
|              | Kabashiko A            | 6.90           | 3.50  | 1.97  | 2                     | 44.98               | -1.83                | Tm                     |
|              | Kabashiko B            | 7.20           | 3.80  | 1.89  | 7                     | 47.15               | -1.54                | Tm                     |
|              | Kabashiko C            | 7.30           | 3.70  | 1.97  | 1                     | 58.45               | -2.52                | Tm                     |
|              | Kaori-ine 3            | 7.70           | 3.50  | 2.20  | 6                     | 55.98               | -0.38                | Tm                     |
|              | Keitoku                | 7.50           | 3.80  | 1.97  | 2                     | 74.64               | -3.13                | Tm                     |
|              | Kumamoto               | 7.10           | 3.70  | 1.92  | 1                     | 53.91               | -2.37                | Tm                     |
|              | Mangoku                | 6.80           | 3.30  | 2.06  | 10                    | 13.23               | 0.40                 | Tr                     |
|              | Nioi-yoshi 1           | 7.00           | 3.70  | 1.89  | 16                    | 46.30               | 0.80                 | Tr                     |
|              | Nioi-yoshi 2           | 6.50           | 3.60  | 1.81  | 1                     | 46.30               | -2.15                | Tm                     |
|              | Seikoku-kawachi        | 7.00           | 3.70  | 1.89  | 0                     | 27.57               | -1.33                | Tm                     |
|              | Shiro-wase             | 6.90           | 3.90  | 1.77  | 6                     | 3.10                | 0.18                 | Tm                     |
|              | Clade 8                | Jakou-ine 1    | 7.00  | 3.60  | 1.94                  | 9                   | 27.39                | -0.43                  |
| Jakou-ine 4  |                        | 6.80           | 3.80  | 1.79  | 9                     | 27.39               | -0.91                | Tm                     |
| Jakou-mochi  |                        | 6.50           | 3.90  | 1.67  | 0                     | 27.54               | -1.56                | Tm                     |
| Nioi-mochi 1 |                        | 6.60           | 3.80  | 1.74  | 10                    | 54.41               | -4.09                | Tm                     |
| Nioi-mochi 2 |                        | 6.90           | 3.70  | 1.86  | 2                     | 91.00               | -1.61                | Tm                     |
| Kamari       |                        | 6.80           | 3.50  | 1.94  | 1                     | 24.98               | -1.07                | Tm                     |
| Clade 9      | Hieri                  | 6.80           | 3.70  | 1.84  | 3                     | 30.00               | -1.21                | Tm                     |
|              | Kaisen                 | 6.40           | 3.60  | 1.78  | 0.1                   | 70.92               | -3.34                | Tm                     |
|              | Wase-hieri             | 6.50           | 3.60  | 1.81  | 1                     | 45.87               | -2.13                | Tm                     |
